# Supplementary material for: Preparation of LiCoO2 concaved cuboctahedra and their electrochemical behavior in lithium-ion battery
Source: Royal Society of Chemistry journal article supplement (doi:10.1039/c1dt10228a), 2011-01-01

## Supporting Information:

S1: As-obtained products under different reaction conditions.

| Reaction temp (°C) | Reaction time (h) | [KOH] (mol/L) | Morphology                 | Size (μm)   | Phase composition                           |
|--------------------|-------------------|---------------|----------------------------|-------------|---------------------------------------------|
| 150                | 24                | 12            | concaved cuboctahedron     | ~1.0        | LiCoO <sub>2</sub>                          |
| 150                | 24                | 8             | irregular partical         | –           | LiCoO <sub>2</sub>                          |
| 150                | 24                | 4             | irregular partical         | –           | LiCoO <sub>2</sub> +<br>Co(OH) <sub>2</sub> |
| 180                | 24                | 12            | flower-like microstructure | ~1.0        | LiCoO <sub>2</sub>                          |
| 120                | 24                | 12            | irregular partical         | –           | LiCoO <sub>2</sub>                          |
| 150                | 12                | 12            | hexagonal plates           | 0.8-<br>1.2 | LiCoO <sub>2</sub>                          |
| 150                | 48                | 12            | concaved cuboctahedron     | ~1.0        | LiCoO <sub>2</sub>                          |

S2: SEM images of the products at the different reaction times: (a) and (b) 12 h; (c) and (d) 48 h.

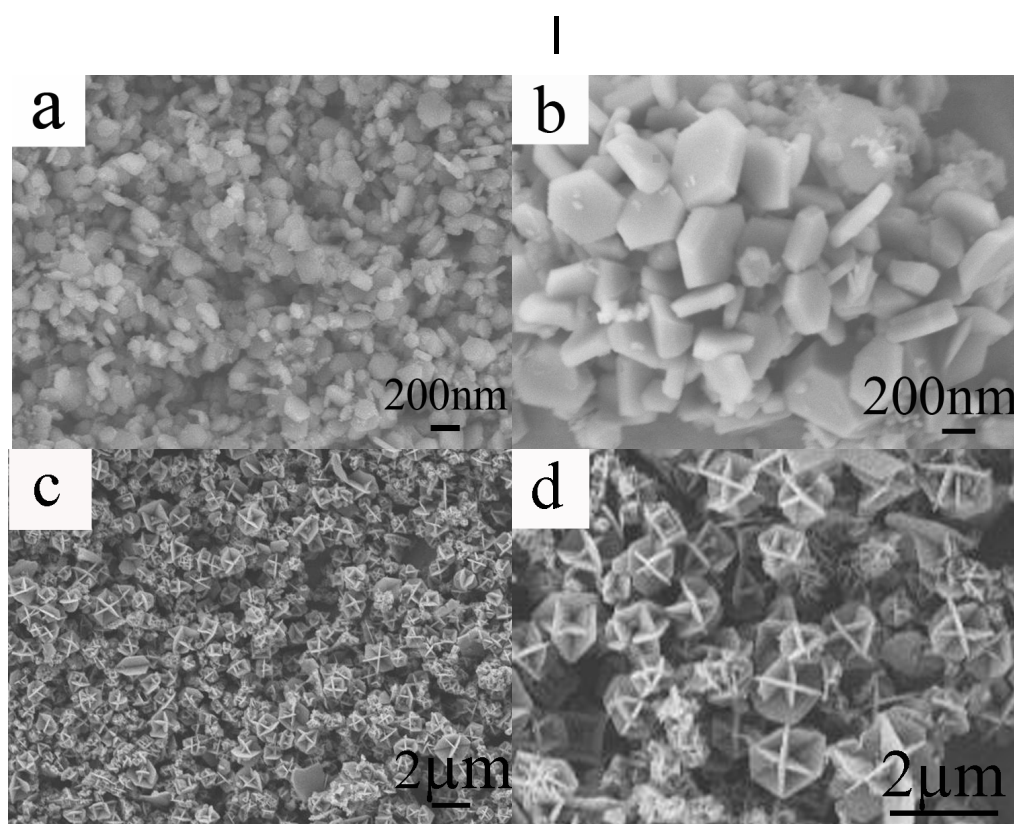

Supplement: c1dt10228a.pdf [file c1dt10228a.pdf]
